# Supplementary material
Source: PubMed Central journal article supplement (PMC6364016)
Supplement: f3e067b0543bff984a5d1cb8f51bc9f0_JVI.01207-18-s0004.pdf [file f3e067b0543bff984a5d1cb8f51bc9f0_JVI.01207-18-s0004.pdf]

## **MOVIE LEGENDS**

**Movie S1.** Immunostaining of ORF2 (red) and ORF3 (green) proteins from F2 cells grown on inserts infected with HEV genotype 3 and sampled 14 days post-infection, followed by imaging using confocal microscopy. The movie shows the consecutive Z stack of x-y sections from the basolateral (0) to the apical (6.6  $\mu\text{m}$ ) side.

**Movie S2.** Immunostaining of ORF2 (red) and Rab27a (green) proteins from F2 cells grown on inserts infected with HEV genotype 3 and sampled 14 days post-infection, followed by imaging using confocal microscopy. The movie shows the consecutive Z stack of x-y sections from the basolateral (0) to the apical (6.6  $\mu\text{m}$ ) side.

**Movie S3.** Immunostaining of ORF2 (red) and DPP4 (green) proteins from F2 cells grown on inserts infected with HEV genotype 3, and sampled 14 days post-infection followed by imaging using confocal microscopy. The movie shows the consecutive Z stack of x-y sections from the basolateral (0) to the apical (6.3  $\mu\text{m}$ ) side.
